# Supplementary material
Source: PubMed Central journal article supplement (PMC3149153)
Supplement: supp_WNL.0b013e318228c136_Figure_e-1.pdf [file supp_WNL.0b013e318228c136_Figure_e-1.pdf]

**Figure e-1**

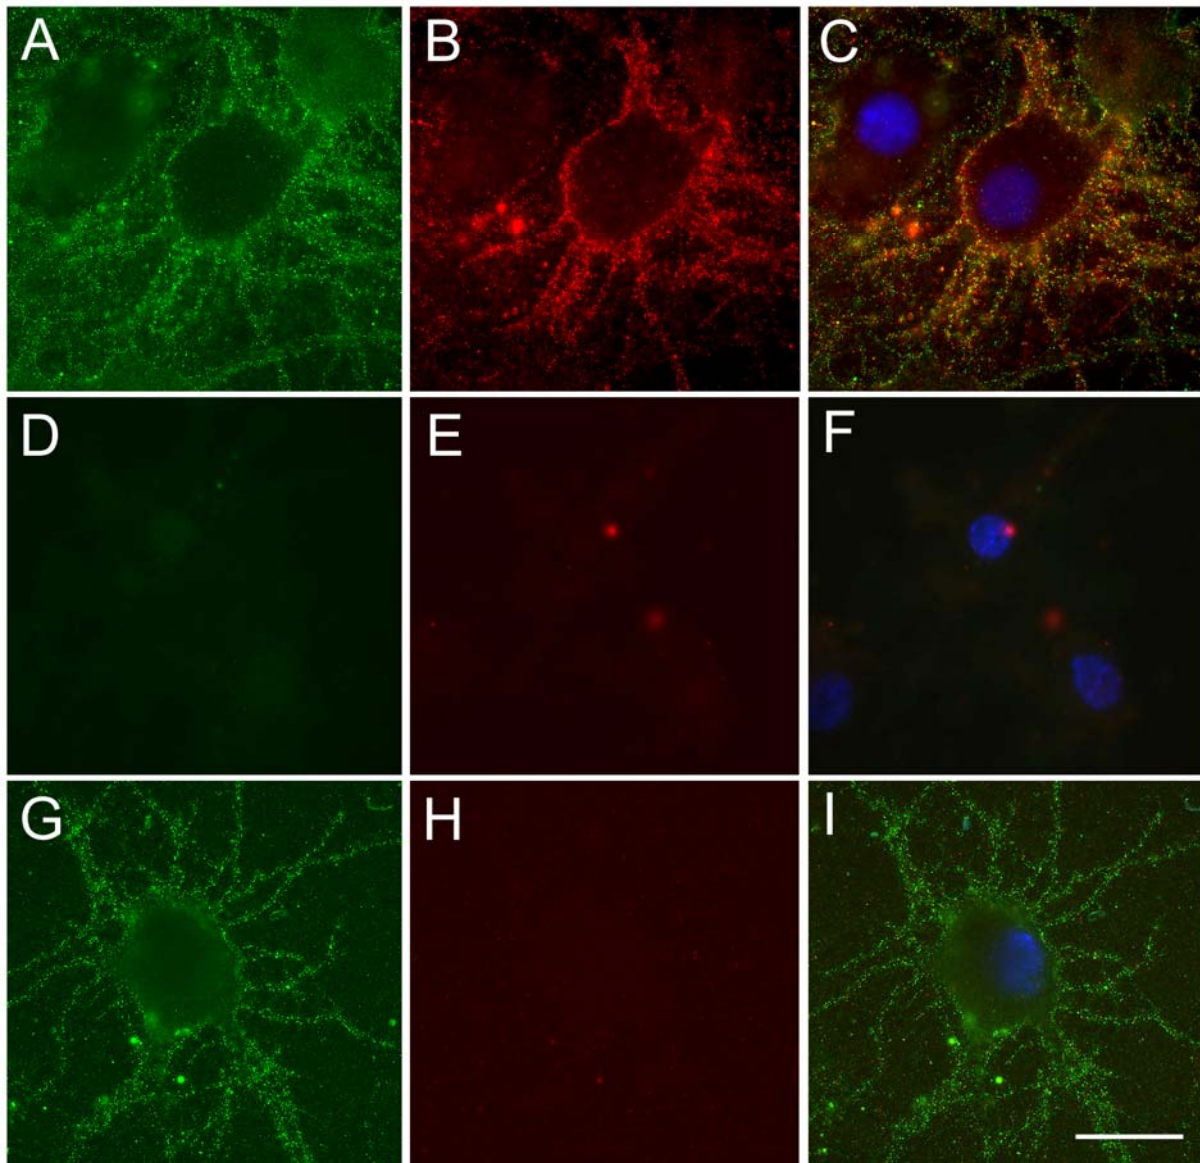

**Figure e-1: Binding of antibodies and complement to live neurons treated with patient's CSF**

Cultures of embryonic rat hippocampal neurons treated with patient's CSF (first and third row) or control CSF (second row), in presence of 5% NHS as a source of complement (first and second row) or heat-inactivated NHS (third row). First column is stained for the presence of

antibodies, second column for complement (anti-C<sub>5b-9</sub>), and the last column shows merged images (IgG + complement) with DAPI nuclear staining. Note the intense cell surface staining with patient's IgG (A and G, green), the linear complement reactivity (B, red), and the absence of complement staining in neurons incubated with control CSF + complement (E), or patient's CSF + heat inactivated complement (H). Similar results were obtained with C9neo (not shown).

Scale = 10  $\mu$ m
