# Supplementary material
Source: PubMed Central journal article supplement (PMC3149153)
Supplement: supp_WNL.0b013e318228c136_Figure_e-2.pdf [file supp_WNL.0b013e318228c136_Figure_e-2.pdf]

**Figure e-2**

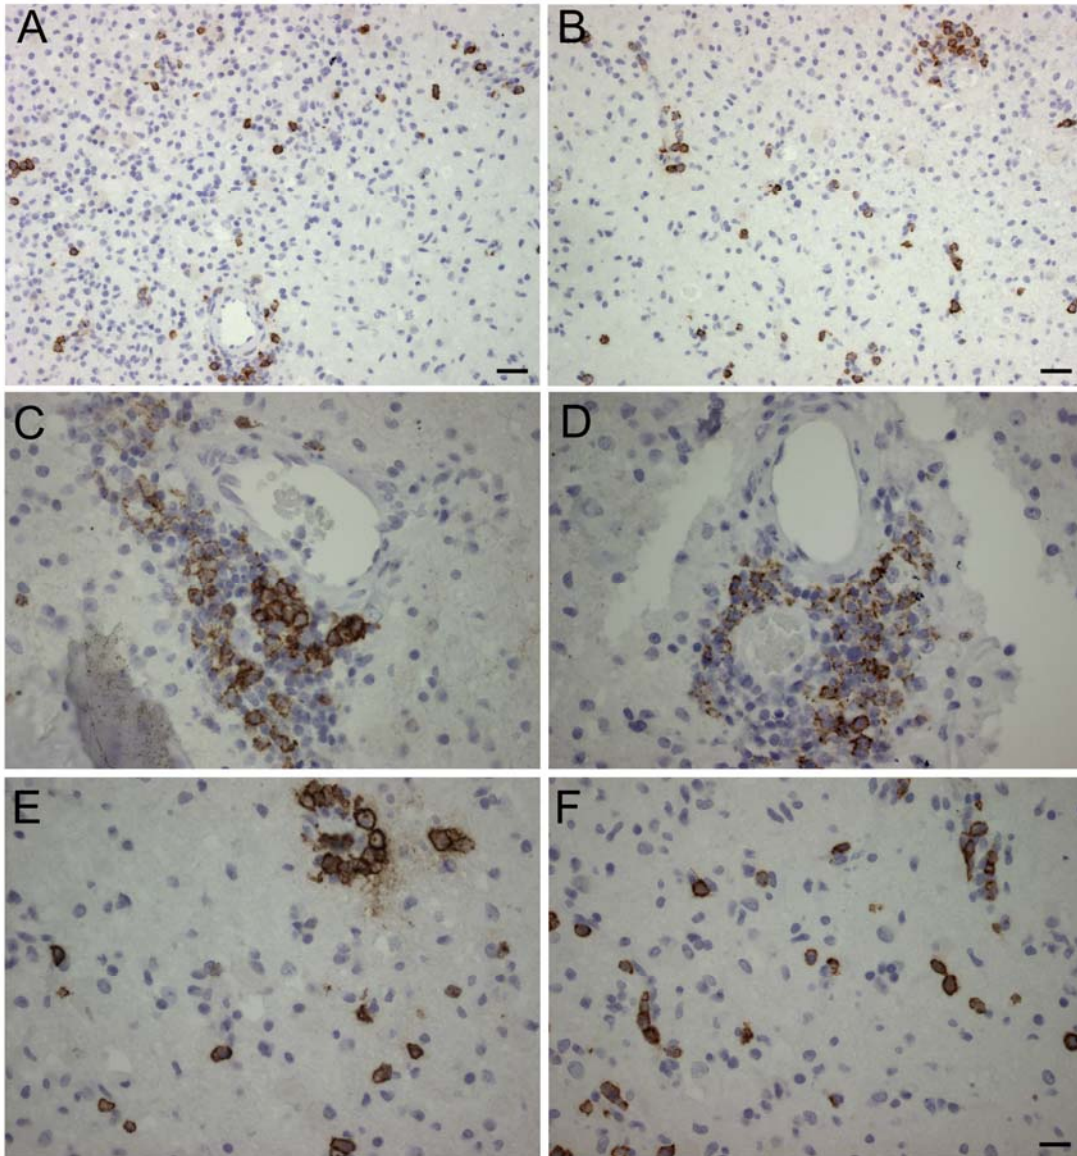

**Figure e-2: CD138+ cells in brain of patients with anti-NMDAR encephalitis**

Low magnification (A, B) and high magnification (C-F) photographs showing infiltrates of CD138+ cells (plasma cells/plasmablasts) in brain of patient #3. Note that CD138+ cells are in

perivascular (A-D) as well as interstitial spaces (A, B, E, F). Scale in A and B = 40  $\mu\text{m}$ , Scale in C-F = 20  $\mu\text{m}$ .
